# Supplementary material for: Tianyu-Py pyrite: a new natural reference material for micro-beam determination of iron isotopic ratios
Source: Royal Society of Chemistry journal article supplement (doi:10.1039/d2ja00002d), 2022-01-01
Supplement: d2ja00002d2.pdf [file d2ja00002d2.pdf]

Table S2. Results of isotopic homogeneity testing of the Tianyu-Py pyrite

| Grain<br>NO. | $^{56}\text{Fe}/^{54}\text{Fe}$ |           |            | $^{57}\text{Fe}/^{54}\text{Fe}$ |         |           |
|--------------|---------------------------------|-----------|------------|---------------------------------|---------|-----------|
|              | $X_1$                           | $X_2$     | $\bar{X}$  | $X_1$                           | $X_2$   | $\bar{X}$ |
| 1            | 16.434944                       | 16.432831 | 16.4338876 | 0.38806                         | 0.38795 | 0.3880041 |
| 5            | 16.438500                       | 16.434562 | 16.4365308 | 0.38817                         | 0.38807 | 0.3881184 |
| 11           | 16.432871                       | 16.436534 | 16.4347026 | 0.38798                         | 0.38808 | 0.3880322 |
| 15           | 16.434471                       | 16.433158 | 16.4338143 | 0.38808                         | 0.38802 | 0.3880502 |
| 21           | 16.436151                       | 16.436898 | 16.4365247 | 0.38807                         | 0.38815 | 0.3881058 |
| 25           | 16.437181                       | 16.436283 | 16.4367320 | 0.38814                         | 0.38805 | 0.3880972 |
| 31           | 16.436227                       | 16.437380 | 16.4368033 | 0.38817                         | 0.38818 | 0.3881770 |
| 35           | 16.438018                       | 16.438128 | 16.4380731 | 0.38821                         | 0.38816 | 0.3881870 |
| 41           | 16.436421                       | 16.441494 | 16.4389572 | 0.38811                         | 0.38825 | 0.3881816 |
| 45           | 16.438997                       | 16.439575 | 16.4392857 | 0.38818                         | 0.38823 | 0.3882068 |
| 51           | 16.439853                       | 16.439457 | 16.4396551 | 0.38823                         | 0.38824 | 0.3882342 |
| 55           | 16.439042                       | 16.439241 | 16.4391415 | 0.38824                         | 0.38817 | 0.3882057 |
| 61           | 16.442520                       | 16.440252 | 16.4413862 | 0.38837                         | 0.38822 | 0.3882970 |
| 65           | 16.437640                       | 16.441484 | 16.4395617 | 0.38820                         | 0.38824 | 0.3882178 |
| 71           | 16.440108                       | 16.432831 | 16.4364695 | 0.38830                         | 0.38801 | 0.3881546 |
