# Supplementary material for: Tianyu-Py pyrite: a new natural reference material for micro-beam determination of iron isotopic ratios
Source: Royal Society of Chemistry journal article supplement (doi:10.1039/d2ja00002d), 2022-01-01
Supplement: d2ja00002d3.xlsx [file d2ja00002d3.xlsx]

## Sheet: Table S3
Table S3
The Fe isotope results of reference materials Aa018 and PAS-Py600 obtained from fs-LA-MC-ICP-MS.
The natural Tianyu-Py pyrite was used as external standard.
Spot ID		δ56Fe	2SE	δ57Fe	2SE
Aa018@1		0.652643	0.045479	0.954925	0.0865509
Aa018@2		0.534123	0.0417379	0.935846	0.0867841
Aa018@3		0.544584	0.0435316	0.769299	0.0837793
Aa018@4		0.61436	0.0524793	1.06487	0.101153
Aa018@5		0.526268	0.0652873	0.755415	0.0847136
Aa018@6		0.557826	0.042737	0.919998	0.0657323
Aa018@7		0.583366	0.0639881	0.872424	0.120474
Aa018@8		0.557226	0.0434447	0.799896	0.0856652
Aa018@9		0.612177	0.0467127	0.932985	0.111039
Aa018@10		0.677286	0.0563462	0.917193	0.125497
Aa018@11		0.444687	0.0399841	0.696243	0.0919986
Aa018@12		0.563158	0.0410506	0.884742	0.0984481
Aa018@13		0.477427	0.0525978	0.849208	0.120911
Aa018@14		0.516942	0.0635019	0.770409	0.0956849
Aa018@15		0.672483	0.0576038	1.03132	0.0951117
Aa018@16		0.656493	0.0424501	0.967982	0.116212
Aa018@17		0.639556	0.0579749	1.03183	0.10337
Aa018@18		0.657191	0.0498524	0.879126	0.0696001
Aa018@19		0.663719	0.0699861	1.04304	0.0937
Aa018@20		0.614814	0.0523322	0.911922	0.101715
Aa018@21		0.635594	0.0551691	1.10304	0.0844589
Aa018@22		0.566478	0.0726519	0.780604	0.0967769
Aa018@23		0.621358	0.0493072	0.886078	0.0871902
Aa018@24		0.664296	0.0678782	1.11982	0.111921
Aa018@25		0.688309	0.0758842	1.07057	0.101837
Average value		0.597695	0.132564	0.917951	0.233978
Recommend values		0.52	0.04	0.73	0.05
PAS-Py600@1		0.199993	0.0368025	0.334523	0.0738863
PAS-Py600@2		0.0935054	0.0409531	0.182998	0.0723435
PAS-Py600@3		0.169327	0.0350443	0.32641	0.070901
PAS-Py600@4		0.101748	0.0486522	0.125211	0.0774303
PAS-Py600@5		0.246004	0.0523795	0.318458	0.0722168
PAS-Py600@6		0.0796719	0.0402429	0.230109	0.100991
PAS-Py600@7		0.125886	0.0458858	0.189637	0.0712098
PAS-Py600@8		0.29913	0.0744361	0.402716	0.118192
PAS-Py600@9		0.115537	0.0388463	0.318076	0.0715189
PAS-Py600@10		0.128607	0.0427549	0.233651	0.064329
PAS-Py600@11		0.211497	0.0373436	0.35591	0.0674638
PAS-Py600@12		0.0826857	0.0435532	0.16103	0.086263
PAS-Py600@13		0.0702662	0.0386849	0.147341	0.0700301
PAS-Py600@14		0.197716	0.039799	0.327118	0.0707795
PAS-Py600@15		0.244948	0.0441317	0.457244	0.0790619
PAS-Py600@16		0.192814	0.0560922	0.453926	0.0920257
PAS-Py600@17		0.296134	0.0402108	0.429449	0.0787424
PAS-Py600@18		0.191566	0.0451272	0.347122	0.085959
PAS-Py600@19		0.190825	0.0389531	0.427267	0.0761511
PAS-Py600@20		0.240904	0.0442478	0.382045	0.0833706
PAS-Py600@21		0.215991	0.0349909	0.327304	0.0707311
PAS-Py600@22		0.214416	0.0402386	0.458711	0.0738589
PAS-Py600@23		0.270015	0.0556527	0.511797	0.0851076
PAS-Py600@24		0.178849	0.0445015	0.412041	0.0592475
PAS-Py600@25		0.217846	0.0546745	0.375697	0.0732994
Average value		0.183035	0.134716	0.329432	0.217194
Recommend values		0.19	0.03	0.29	0.06
